# Supplementary material for: Mechanoregulatory role of TRPV4 in prenatal skeletal development
Source: PubMed Central journal article supplement (PMC9876556; doi:10.1126/sciadv.ade2155), 2023-01-25
Supplement: sciadv.ade2155_sm.pdf [file sciadv.ade2155_sm.pdf]

Supplementary Materials for  
**Mechanoregulatory role of TRPV4 in prenatal skeletal development**

Nidal S. Khatib *et al.*

Corresponding author: Niamh C. Nowlan, [niamh.nowlan@ucd.ie](mailto:niamh.nowlan@ucd.ie)

*Sci. Adv.* 9, eade2155 (2023)  
DOI: 10.1126/sciadv.ade2155

**The PDF file includes:**

Figs. S1 to S6  
Legend for movie S1

**Other Supplementary Material for this manuscript includes the following:**

Movie S1

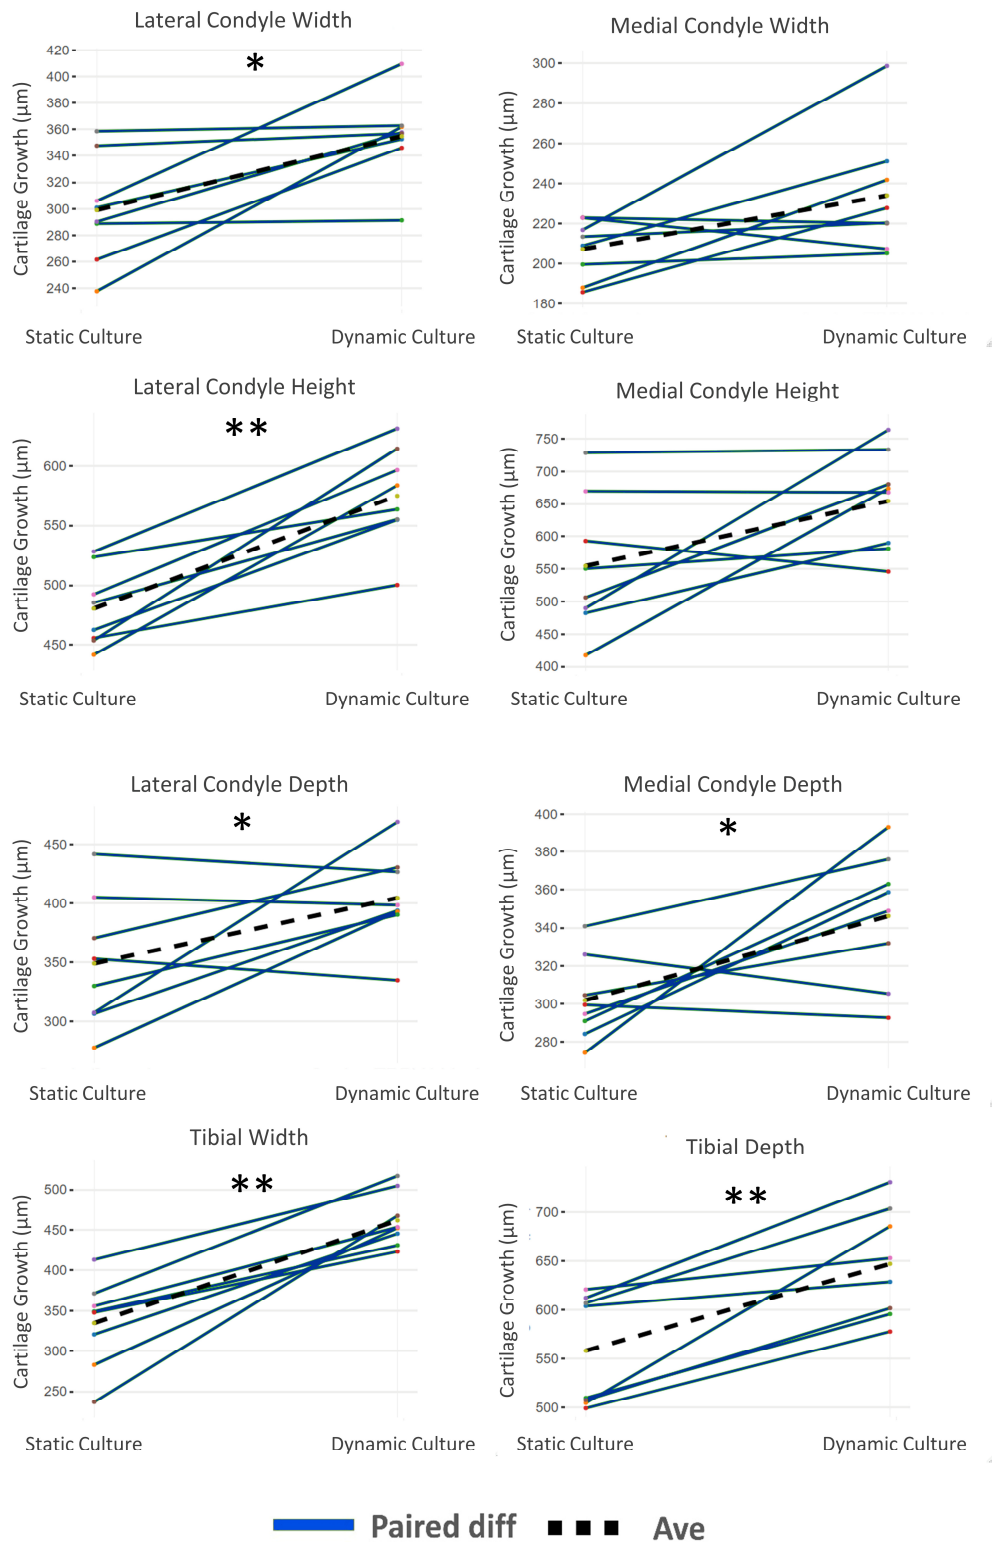

**Fig. S1.1. Paired sample differences in joint cartilage feature growth between statically and dynamically cultured limbs.** Each line shows the difference between contralateral limbs of one embryo exposed to either static culture (petri dish) or dynamic culture (mechanical stimulation). \*  $p < 0.05$ ; \*\*  $p < 0.01$ ;  $n=8$  limbs per condition.

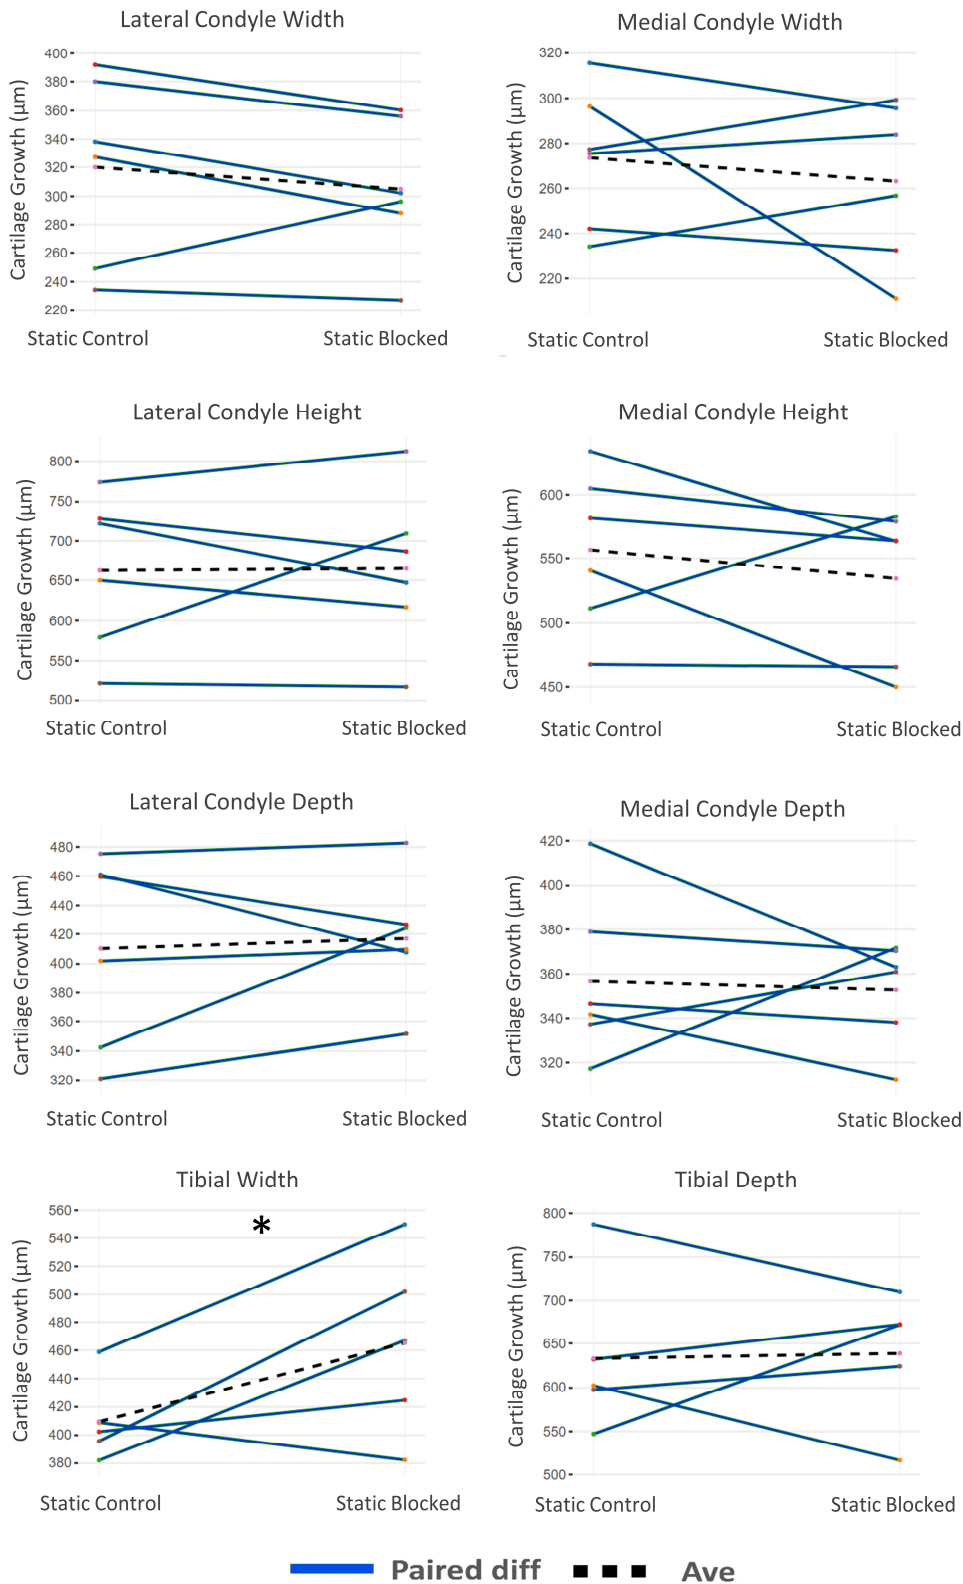

**Fig. S1.2. Paired sample differences in joint cartilage feature growth between static vehicle control and static blocked limbs.** Each line shows the difference between contralateral limbs of one embryo exposed either static culture with the blocker (10µM RN-1734) or with the drug vehicle only (DMSO). \*  $p < 0.05$ ; \*\*  $p < 0.01$ ;  $n = 5-6$  limbs per condition.

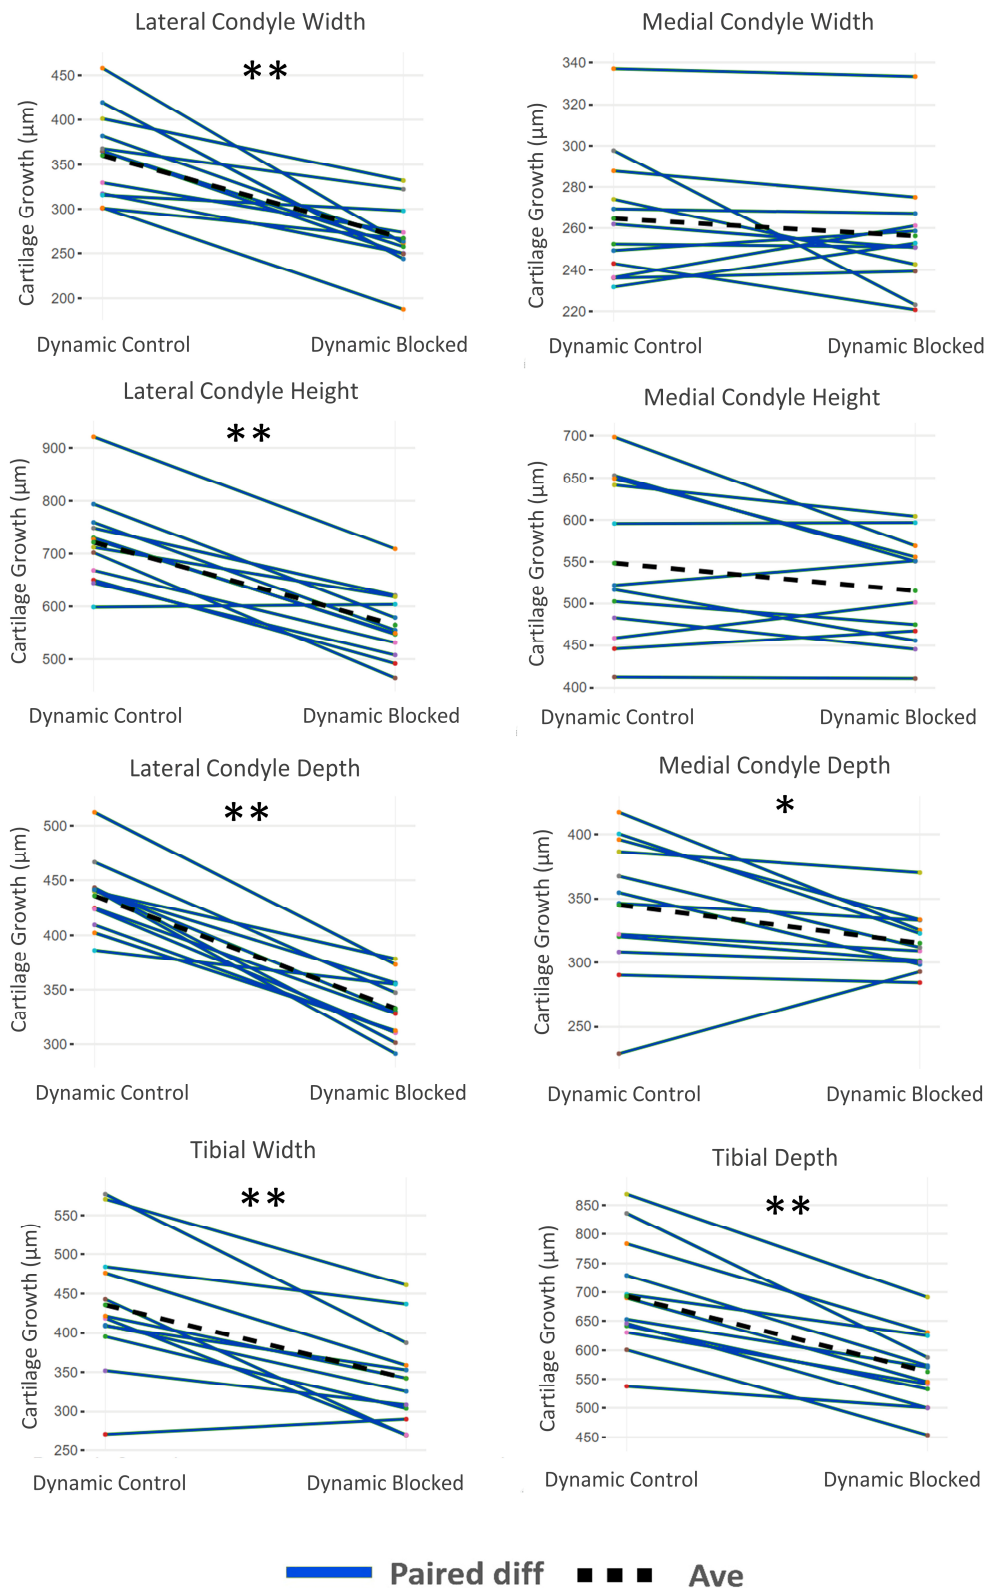

**Fig. S1.3. Paired sample differences in joint cartilage feature growth between dynamic control and dynamic blocked limbs.** Each line shows the difference between contralateral limbs of one embryo exposed to either dynamic culture with the blocker (10 $\mu\text{M}$  RN-1734) or with the drug vehicle only (DMSO). \*  $p < 0.05$ ; \*\*  $p < 0.01$ ;  $n = 12$  limbs per condition.

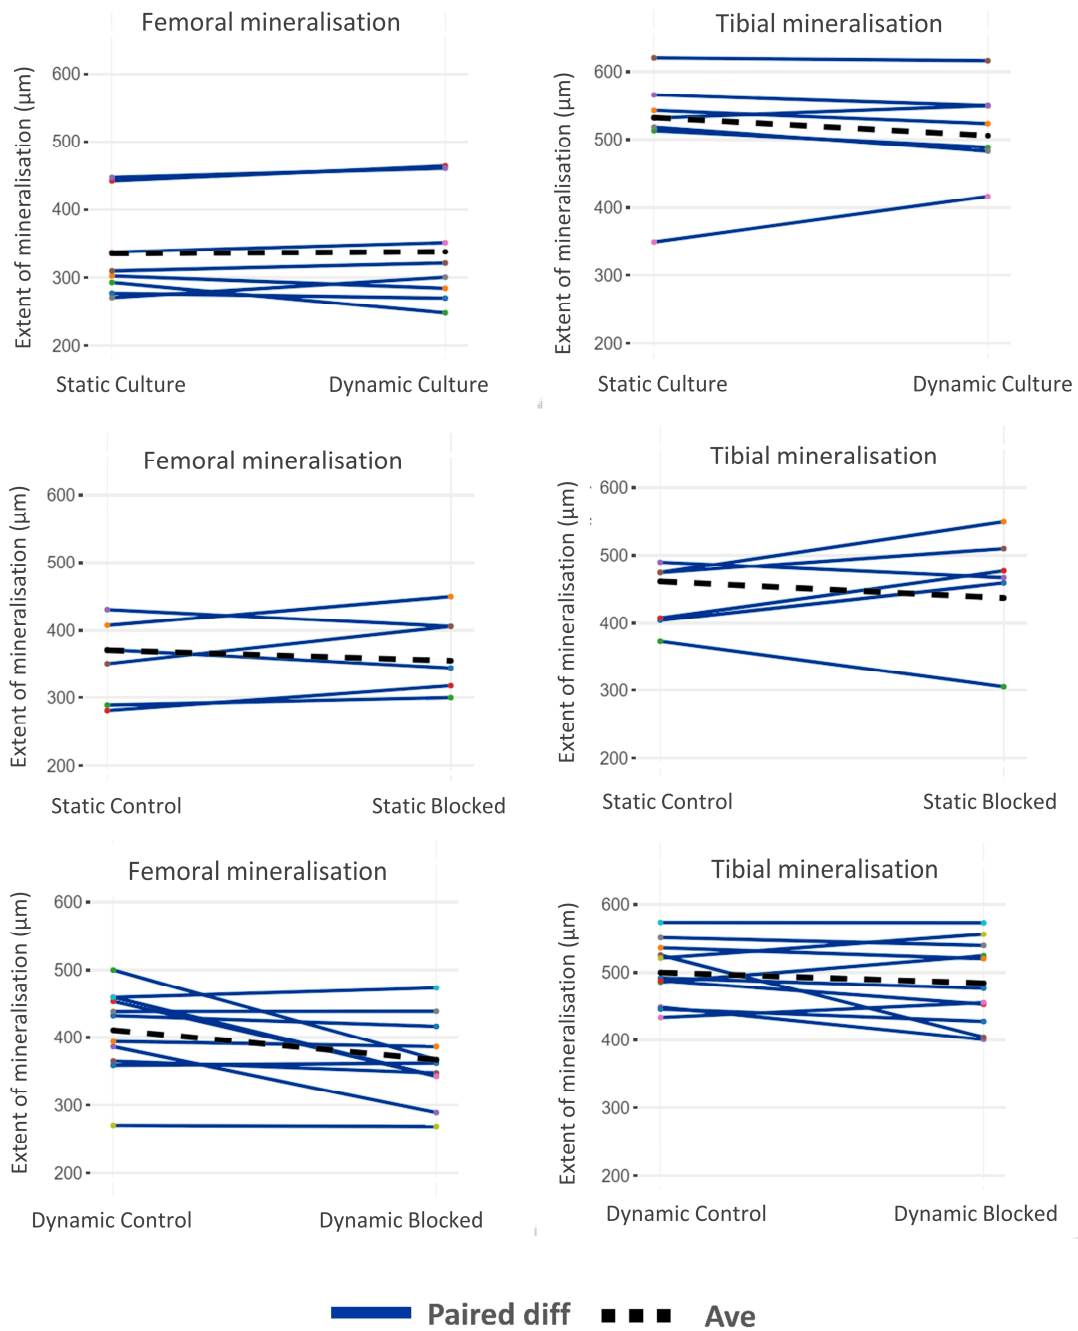

**Fig S2. Paired sample differences in diaphyseal mineralization in all comparison groups.** Each line shows the difference between contralateral limbs of one embryo. \*  $p < 0.05$ ; \*\*  $p < 0.01$ ; static vs dynamic,  $n = 6$  limbs per condition; dynamic control vs dynamic blocked,  $n = 10$  limbs per condition, dynamic control vs dynamic blocked,  $n = 6$  limbs per condition.

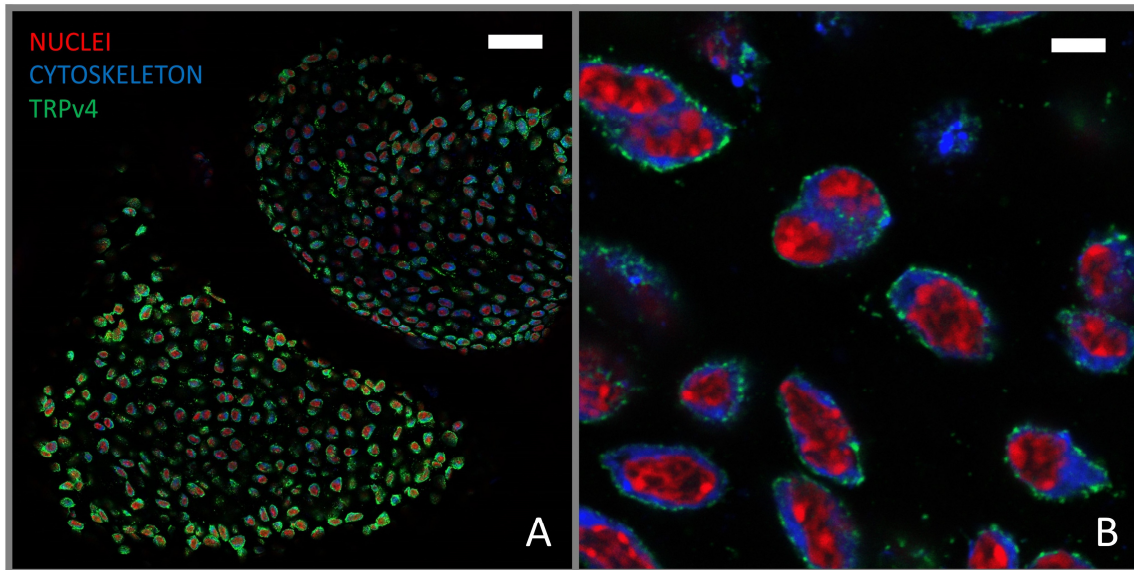

**Fig. S3. Immunolocalization of TRPV4 on the cell membrane of embryonic murine epiphyseal chondrocytes.** Red; nuclei, blue; cell cytoskeleton, green; TRPV4 immunolocalization. Scale bars: 50 $\mu$ m for A and 10 $\mu$ m for B.

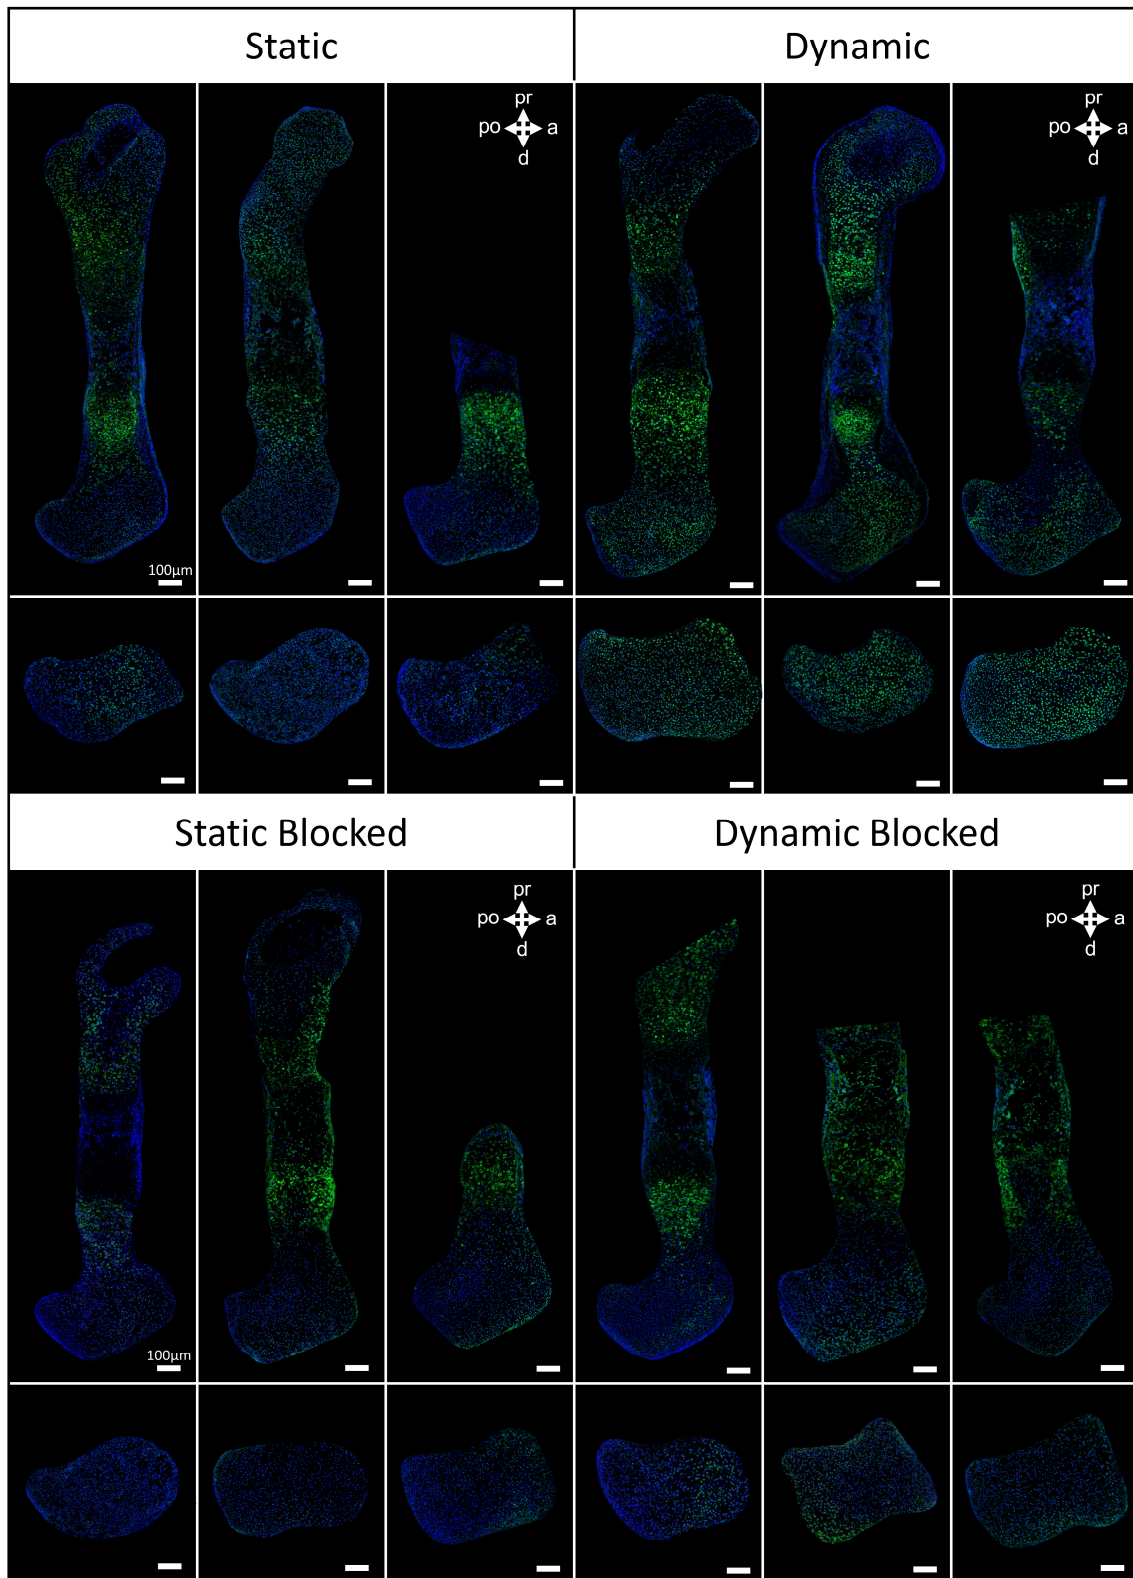

**Fig S4. Regional TRPV4 protein expression within all mouse embryo femora.** Each column represents contralateral limbs from a single embryo split into two comparison groups. The static and dynamic vehicle control limbs (top row) are horizontally mirrored to aid comparison across the whole dataset. n=3 limbs per comparison group.

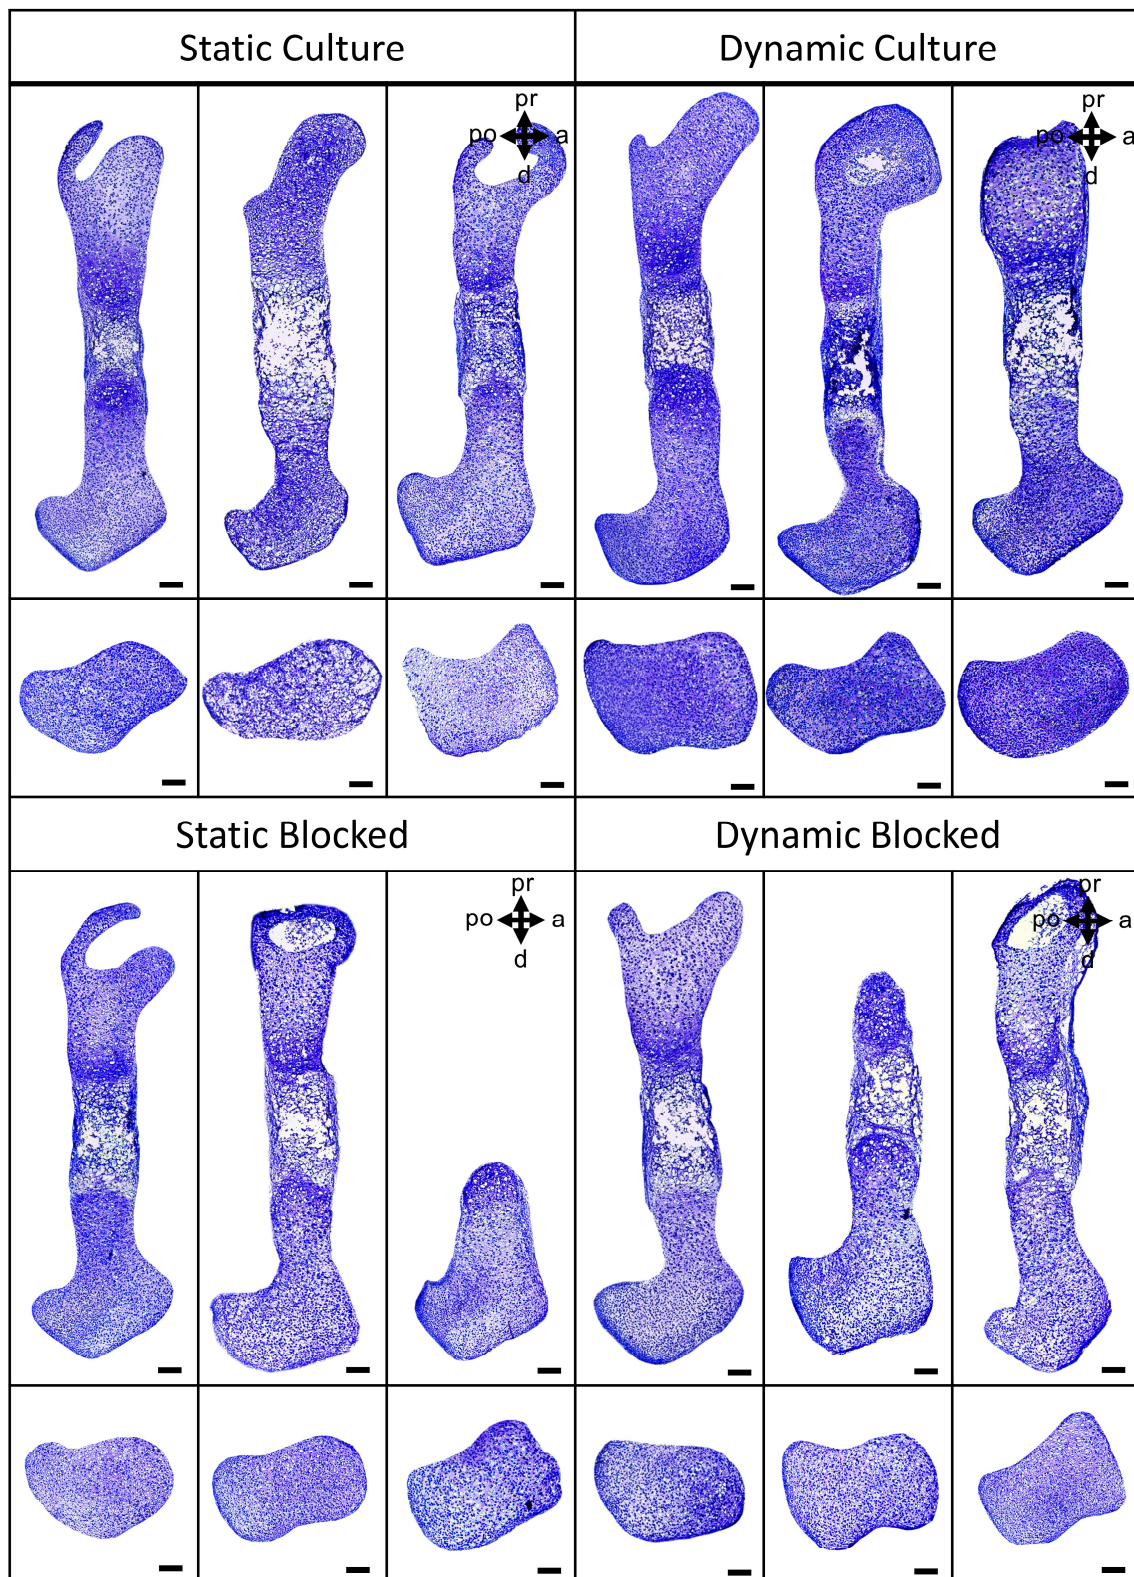

**Fig. S5. Glycosaminoglycans localization within all mouse embryo femora.** Each column represents contralateral limbs from a single embryo in two comparison groups. The static and dynamic vehicle control limbs (top row) are horizontally mirrored to aid comparison across the whole dataset. n=3 limbs per comparison group.



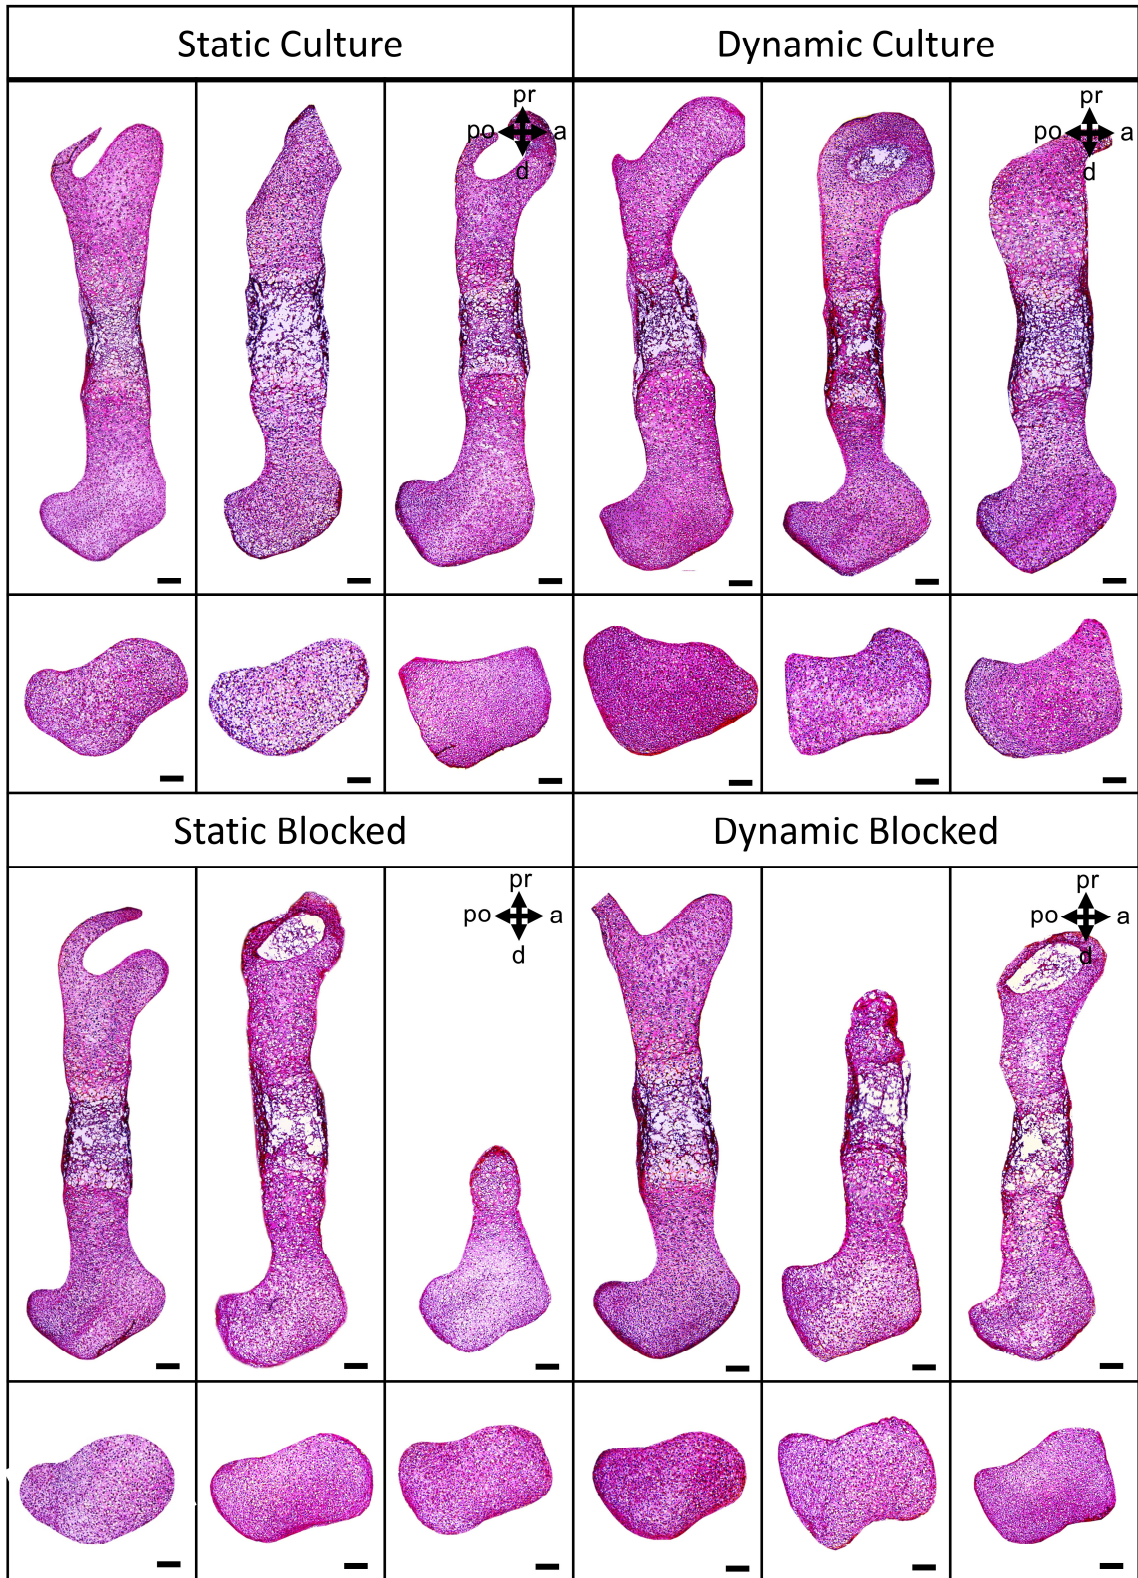

**Fig. S6. Collagen localization within all mouse embryo femora. Each column represents contralateral limbs from a single embryo in two comparison groups. The static and dynamic vehicle control limbs (top row) are horizontally mirrored to aid comparison across the whole dataset. n=3 limbs per comparison group.**

**Movie S1. Movie illustrating the mechanostimulation bioreactor ex vivo hindlimb culture set-up during a mouse embryo hindlimb loading period.** Six to eight limbs pinned to foam supports were placed within bioreactor chambers for dynamic culture or petri dishes for static culture. Dynamic cultured limbs were exposed to cyclic flexion-extension movements of approximately  $14^{\circ} (\pm 2^{\circ})$  at 0.67Hz, applied by compressive displacement of the foam supports.
